# Supplementary material for: Efficient solvent-free cationization of alkylpolyglycoside based surfactant compositions using natural glycine betaine
Source: Royal Society of Chemistry journal article supplement (doi:10.1039/c5gc02214b), 2015-10-30
Supplement: c5gc02214b1.pdf [file c5gc02214b1.pdf]

## Supplementary information

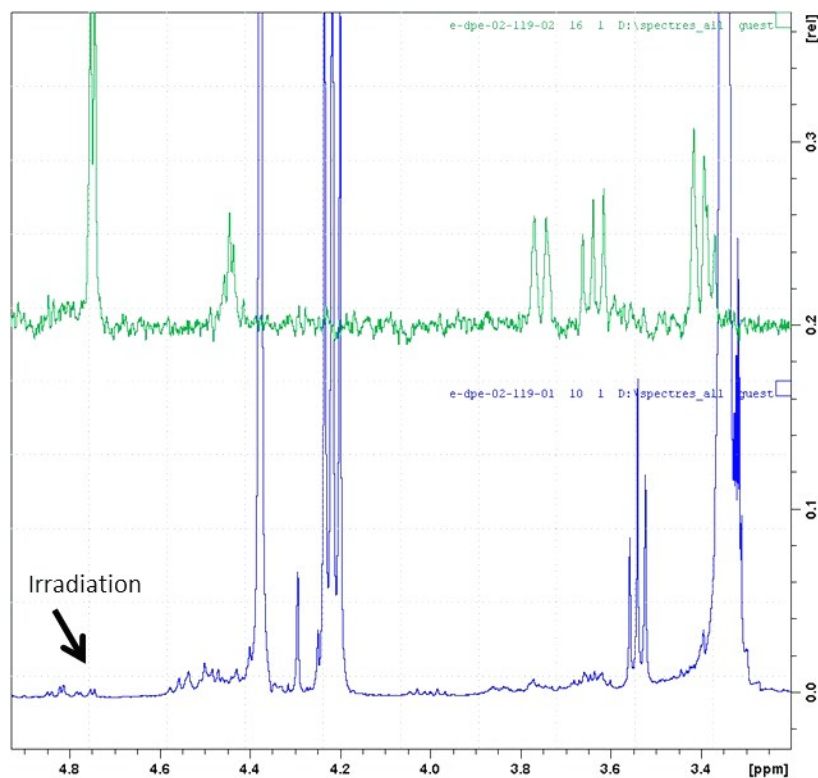

**Fig.1** 1D TOCSY spectrum of the reaction mixture obtained after mixing equimolar amount of *O*-tetradecyl glucoside **3** (0.5 equiv.) and myristic alcohol **2** (0.5 equiv.); in blue, <sup>1</sup>H NMR spectrum of the crude reaction mixture; in red, 1D TOCSY sub-spectrum after selective irradiation of the signal at 4.74 ppm with a mixing time of 200 ms (black arrow).

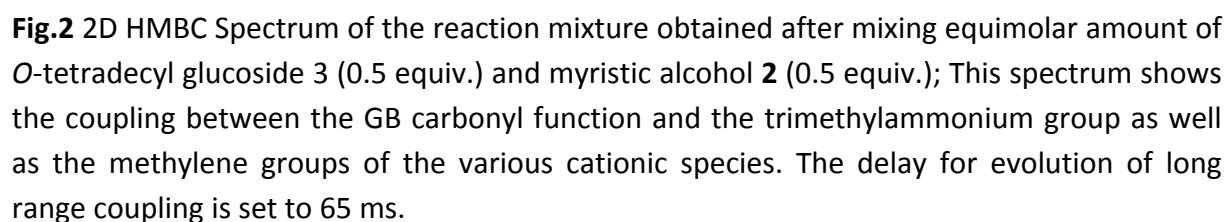

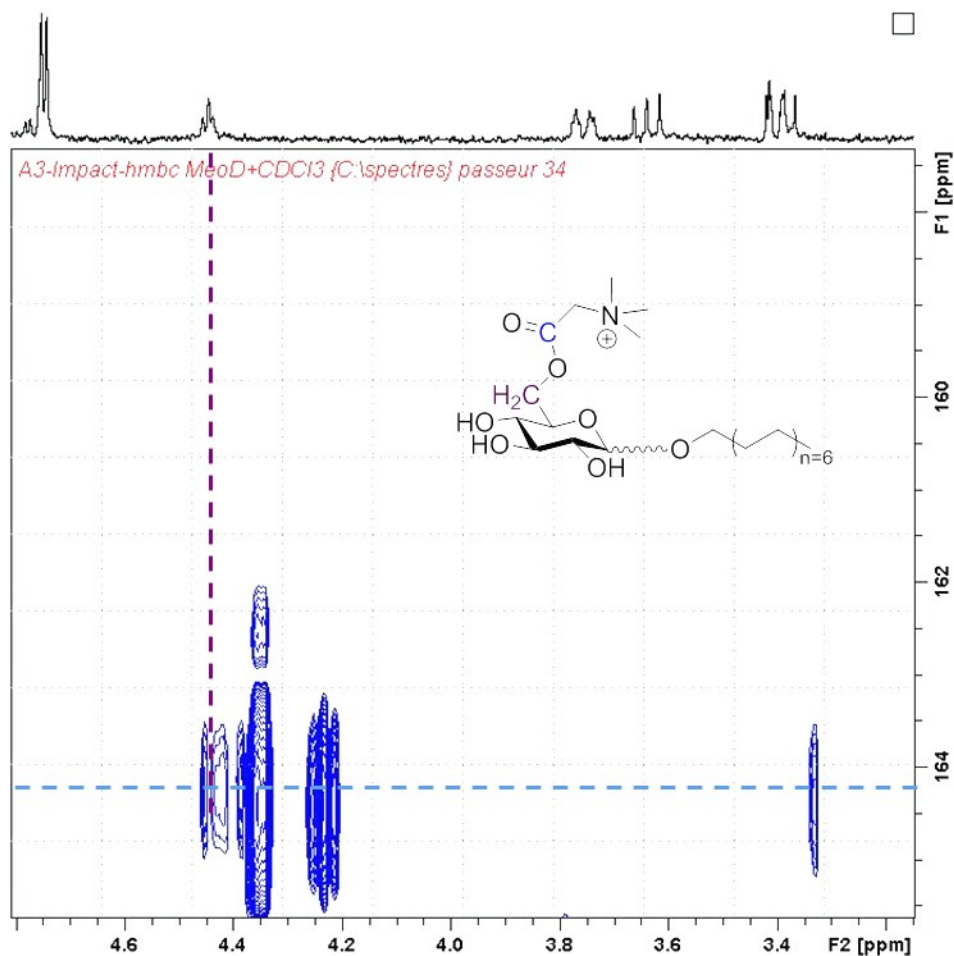

**Fig.3** Projection of the 1D TOCSY sub-spectrum on HMBC spectrum proving that the chemical linkage between GB and glucoside **3** operated at the position 6 of the carbohydrate residue. The delay for evolution of long range coupling is set to 65 ms.

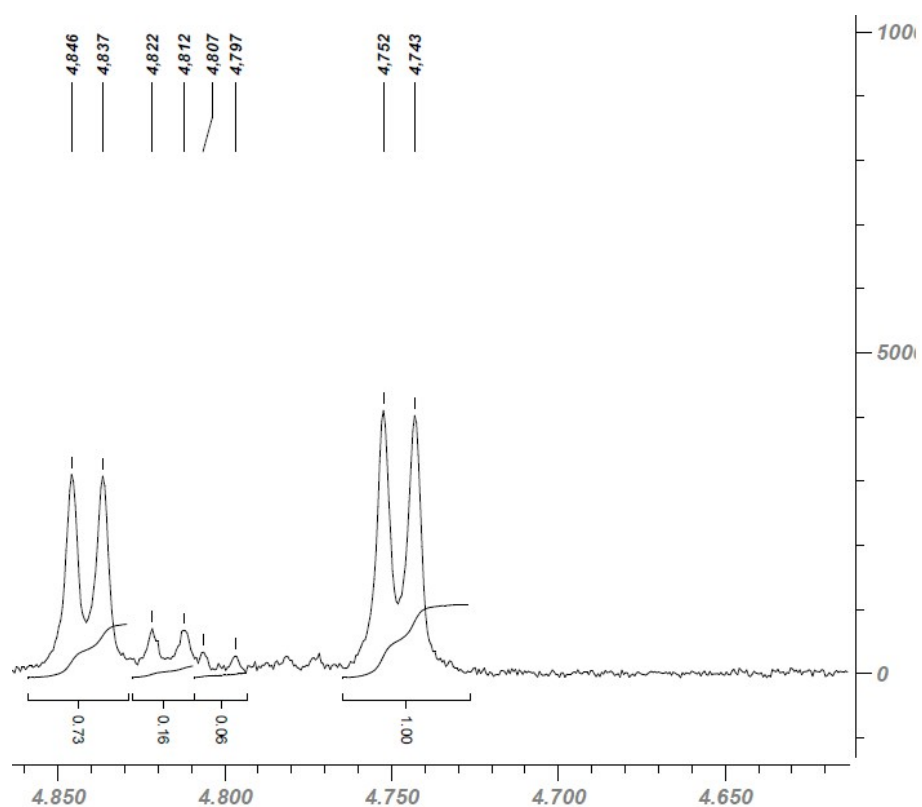

**Fig.4** <sup>1</sup>H NMR signals observed around the signal of the  $\alpha$ -anomeric proton of glucoside **3** after purification by silica gel chromatography. Only cationized versions of glucoside **3** were present in the sample isolated after purification.

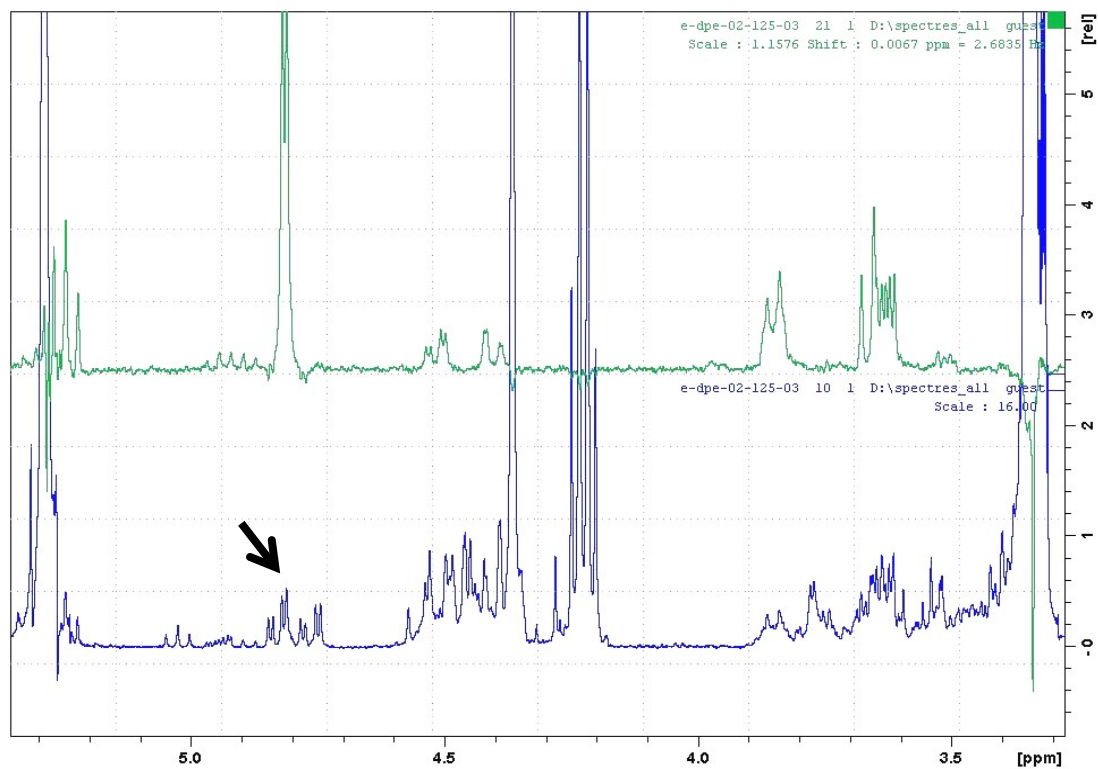

**Fig.5** 1D TOCSY spectrum of the reaction mixture obtained after mixing equimolar amount of *O*-tetradecyl glucoside **3** (0.5 equiv.) and myristic alcohol **2** (0.5 equiv.) and using an excess of GB butyl ester **1** (3 equiv.); in blue,  $^1\text{H}$  NMR spectrum of the crude reaction mixture; in red, 1D TOCSY sub-spectrum after selective irradiation of the signal at 4.81 ppm with a mixing time of 200 ms (black arrow).

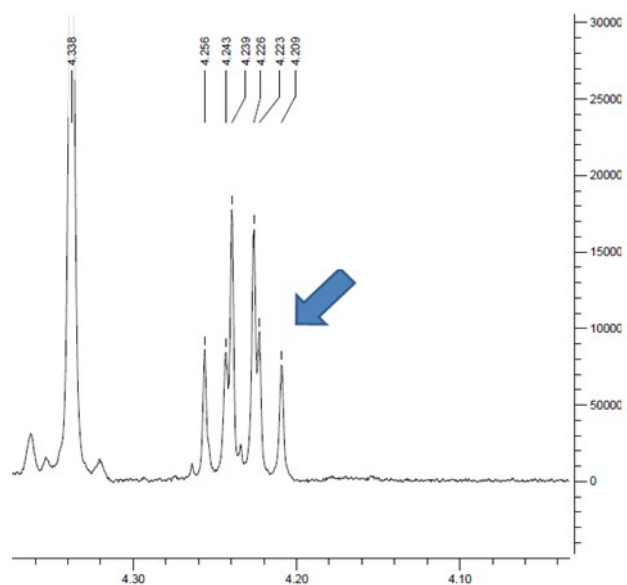

**Fig.6** <sup>1</sup>H NMR signals (blue arrow) of the  $\beta$ -anomeric protons of glucoside **3** and methylene groups of the butyl and myristic chains directly linked to glycine betaine.

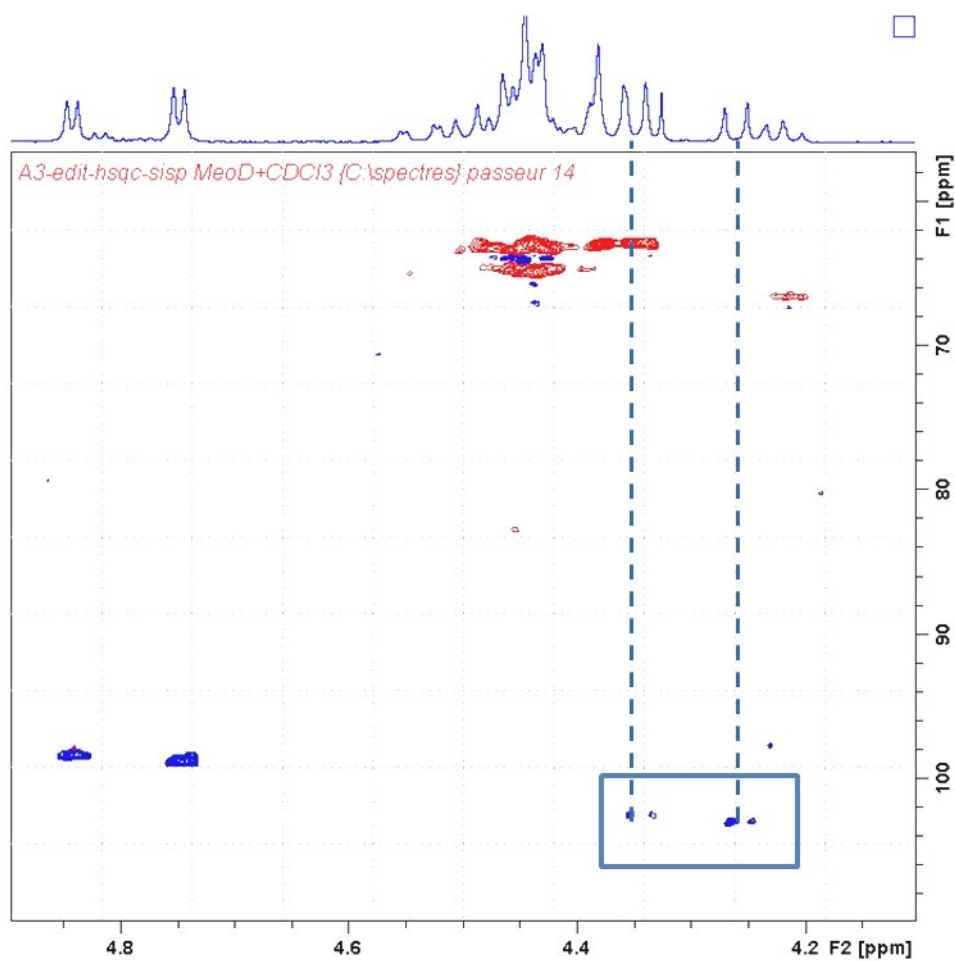

**Fig.7** signals corresponding to the anomeric protons of cationized  $\beta$ -D-glucosides observed by 2D-HSQC experiment.
